# Supplementary material
Source: HighWire-hosted journal article supplement (https://jnm.snmjournals.org/highwire/filestream/94878/field_highwire_adjunct_files/0/166439_Supplemental_Data.pdf)
Supplement: 166439_Supplemental_Data.pdf [file 166439_Supplemental_Data.pdf]

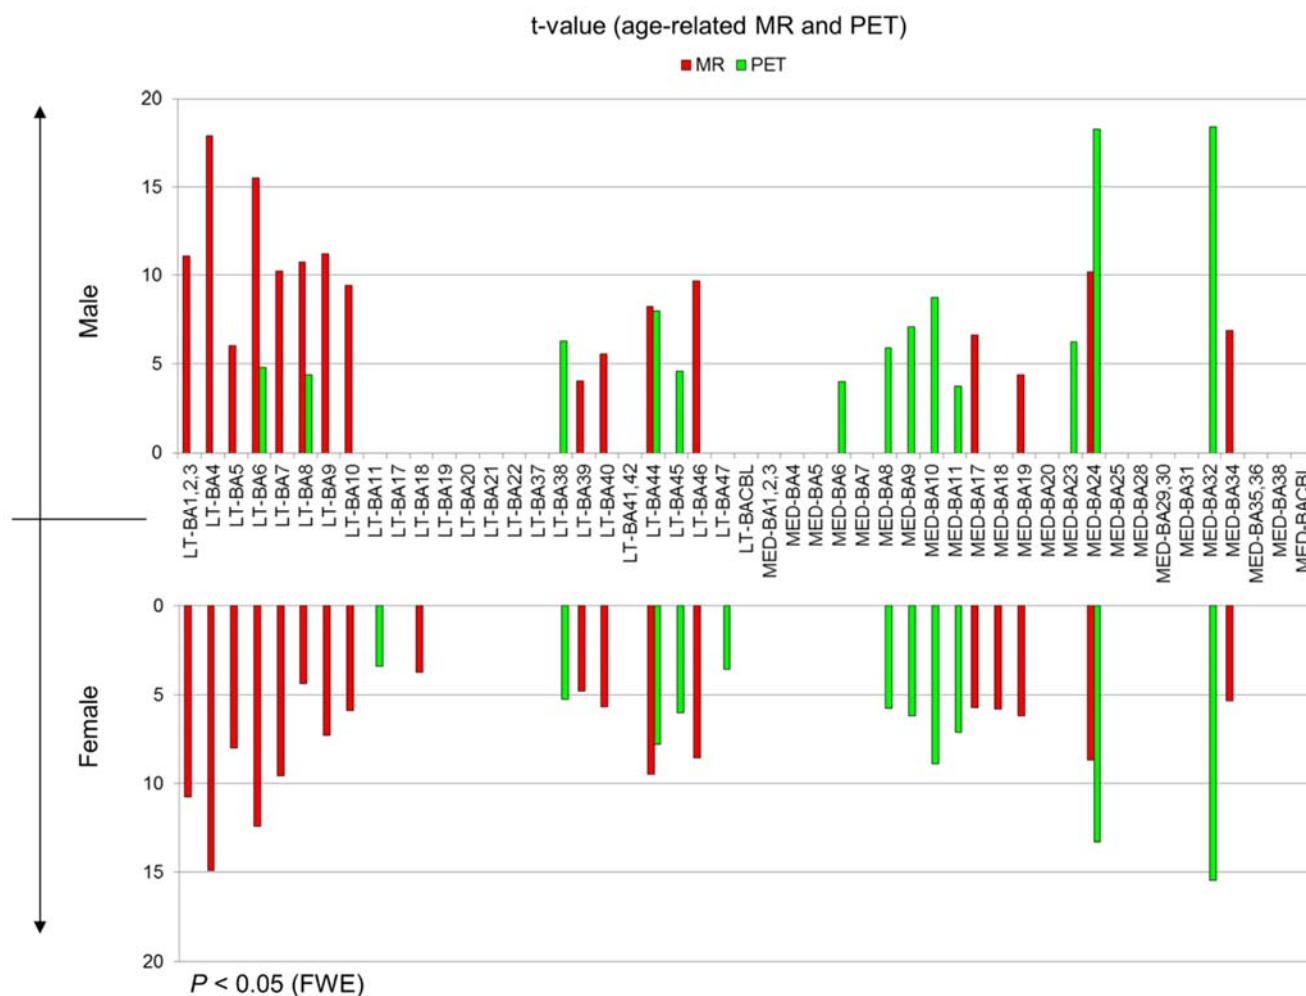

**SUPPLEMENTAL FIGURE 1.** Age-related t-values of each Brodmann area (BA). Each t-value was calculated by the correlation between age and mean pixel value of each BA. Mean pixel value in each BA was calculated using the image after the normalization and the correction of the whole brain pixel value. The red and green indicate t-values in MR and PET images, respectively. The upper graph shows the t-values of the male group and the lower graph indicates the values of the female group ( $p < 0.05$ , FWE). In BA1-10 of the lateral region, age-related MR decreases were shown in both sex groups. In BA8-10, 24 and 32 of the medial region, age-related PET reductions were present in both sex groups.

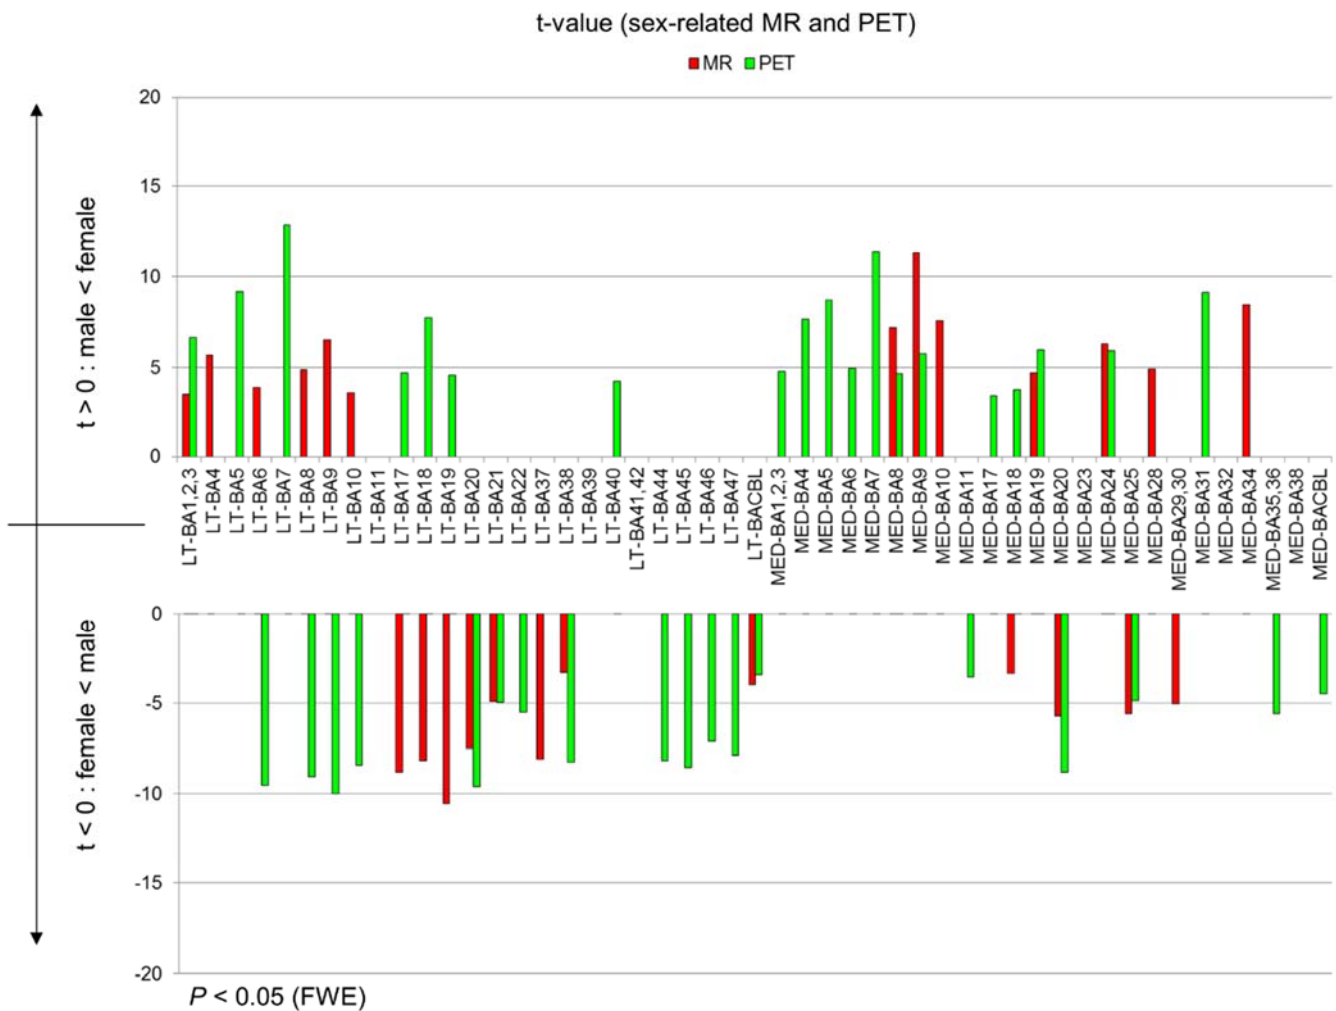

**SUPPLEMENTAL FIGURE 2.** Sex difference-related t-values of each Brodmann area (BA). Each t-value was calculated by t-test among sexes using mean pixel value of each BA. Mean pixel value in each BA was calculated using the image after the normalization and the correction of the whole brain pixel value. The red and green indicate t-values in MR and PET images, respectively. The upper graph shows the regions with lower pixel values in men than in women, and the lower graph shows the regions with lower pixel values in women than in men ( $p < 0.05$ , FWE). The BA44 and BA46 regions in the lateral lobe manifest as female-specific reduction areas, and the BA5, BA7 and BA31 regions were the regions with male-dominant decrease.
